# Supplementary material for: The Interactive Effect of Genetic and Epigenetic Variations in FKBP5 and ApoE Genes on Anxiety and Brain EEG Parameters
Source: MDPI journal article supplement (doi:10.3390/genes13020164), 2022-01-18
Supplement: s1 [file s1]

**Primers for pyrosequencing promotor region FKBP5 (region, hg19 6:35,656,792-35,656,628)**

**FKBP5-prom-F BIOTIN-5'ATAGTTTYGGGGTTTTATGGAAGG3'**

**FKBP5-prom-R 5'TACTCCRCTAACCCTTCAACCC3'**

**Table S1.** Allele frequency differences for rs1360780 in FKBP5 gene

| Groups                     | Allele freq. differences (chi square, p-value) |
|----------------------------|------------------------------------------------|
| ND vs. Nona+               | chi2=0.03 p=0.85360 (P)                        |
| ND vs. Patients with AD    | chi2=0.59 p=0.44236(P)                         |
| Nona+ vs. Patients with AD | chi2=0.46 p=0.49633 (P)                        |

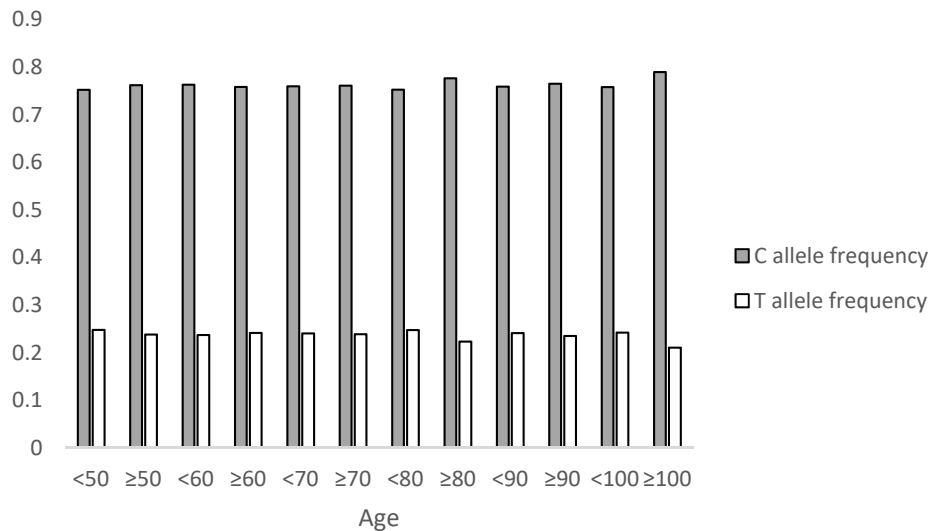

**Figure S1.** Allele frequency differences for rs1360780 in *FKBP5* gene in ND and Nona+ groups depending on the age

**Table S2.** Allele frequency differences for rs1360780 in FKBP5 gene in ND and Nona+ groups depending on the age

| Groups                 | Allele freq. differences |
|------------------------|--------------------------|
| 19-39 vs. 40-59 years  | chi2=0.46 p=0.49619 (P)  |
| 19-39 vs. 60-79 years  | chi2=0.00 p=0.99463 (P)  |
| 19-39 vs. 80-107 years | chi2=0.63 p=0.42787 (P)  |
| 40-59 vs. 60-79 years  | chi2=0.80 p=0.36979 (P)  |

---

**40-59 vs. 80-107 years**

chi2=0.01 p=0.92773 (P)

---

**60-79 vs. 80-107 years**

chi2=1.20 p=0.27417 (P)

---

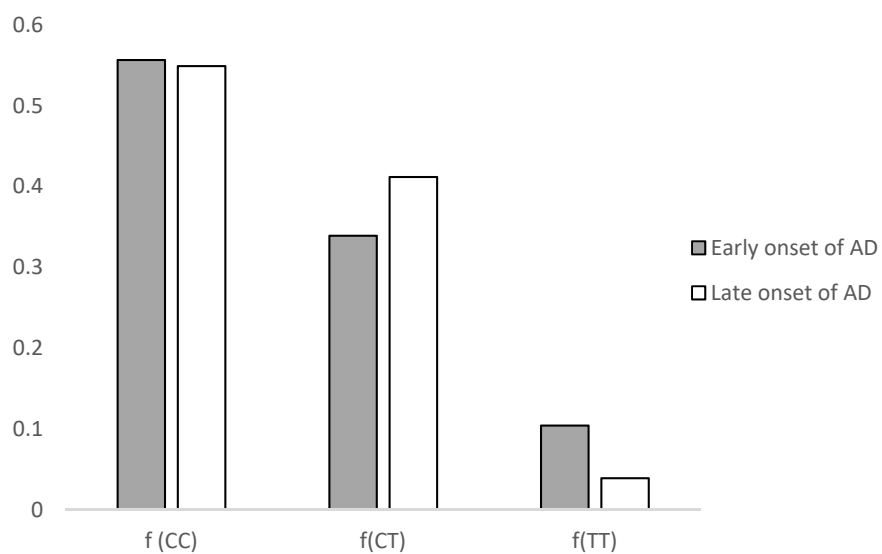

**Figure S2.** Frequencies of CC, CT, and TT genotypes in rs1360780 FKBP5 in patients with early (< 65) and late ( $\geq 65$ ) forms of AD

**Table S3.** Allele frequencies of  $\epsilon 2/\epsilon 3/\epsilon 4$  polymorphism in APOE gene

| Group                                   | Number | Genotypes frequency     |                         |                         |                         |                         |                         | Allele frequency |              |              | HWE,<br>p-value<br>(Pearson) |
|-----------------------------------------|--------|-------------------------|-------------------------|-------------------------|-------------------------|-------------------------|-------------------------|------------------|--------------|--------------|------------------------------|
|                                         |        | $\epsilon 2/\epsilon 2$ | $\epsilon 2/\epsilon 3$ | $\epsilon 2/\epsilon 4$ | $\epsilon 3/\epsilon 3$ | $\epsilon 3/\epsilon 4$ | $\epsilon 4/\epsilon 4$ | $\epsilon 2$     | $\epsilon 3$ | $\epsilon 4$ |                              |
| ND                                      | 479    | 0                       | 0,150                   | 0,013                   | 0,660                   | 0,165                   | 0,012                   | 0,081            | 0,817        | 0,101        | 0,584441                     |
| Nona+                                   | 100    | 0                       | 0,180                   | 0,020                   | 0,630                   | 0,150                   | 0,020                   | 0,100            | 0,795        | 0,105        | 0,339557                     |
| Patients with<br>Alzheimer's<br>disease | 221    | 0                       | 0,063                   | 0,009                   | 0,394                   | 0,407                   | 0,127                   | 0,036            | 0,629        | 0,335        | 0,330537                     |

**Table S4** Allele frequency differences for  $\epsilon 2/\epsilon 3/\epsilon 4$  polymorphism in *APOE* gene

| Groups                           | Allele freq. differences (chi square, p-value) |
|----------------------------------|------------------------------------------------|
| ND vs . Long-livers              | chi2=0.03 p=0.87340 (P)                        |
| ND vs. Patients with AD          | chi2=114.31 p=1.116e-26 (P)                    |
| Long-livers vs. Patients with AD | chi2=37.51 p=9.115e-10 (P)                     |

**Table S5.** Demographic characteristics of participants with EEG

|            | All participants |                       | Men            |                       | Women          |                       |
|------------|------------------|-----------------------|----------------|-----------------------|----------------|-----------------------|
|            | <i>FKBP CC</i>   | <i>FKBP CT&amp;TT</i> | <i>FKBP CC</i> | <i>FKBP CT&amp;TT</i> | <i>FKBP CC</i> | <i>FKBP CT&amp;TT</i> |
| N          | 94               | 67                    | 31             | 29                    | 63             | 38                    |
| Age, years | 49.8 $\pm$ 1.8   | 47.4 $\pm$ 2.0        | 47.2 $\pm$ 3.4 | 45.8 $\pm$ 3.3        | 51.1 $\pm$ 2.0 | 48.6 $\pm$ 2.4        |

The data are presented as the means and standard errors

**Table S6.** Log-transformed relative power (mean and SE) of EEG bands in the non-demented men and women with the *FKBP5* CC and *FKBP5* CT&TT genotypes.

| Effect             | Level of Factor | Level of Factor | N   | Delta Mean | Delta SE | Theta Mean | Theta SE | Alpha Mean | Alpha SE | Beta1 Mean | Beta1 SE | Beta2 Mean | Beta2 SE |
|--------------------|-----------------|-----------------|-----|------------|----------|------------|----------|------------|----------|------------|----------|------------|----------|
| Total              |                 |                 | 161 | -2,18      | 0,05     | -1,41      | 0,03     | -0,23      | 0,05     | -1,90      | 0,03     | -2,49      | 0,05     |
| Sex                | Men             |                 | 60  | -2,05      | 0,08     | -1,36      | 0,05     | -0,34      | 0,08     | -1,89      | 0,05     | -2,44      | 0,08     |
| Sex                | Women           |                 | 101 | -2,26      | 0,05     | -1,44      | 0,04     | -0,17      | 0,06     | -1,90      | 0,05     | -2,52      | 0,06     |
| <i>FKBP5</i>       | CC              |                 | 94  | -2,21      | 0,06     | -1,44      | 0,04     | -0,20      | 0,06     | -1,91      | 0,05     | -2,53      | 0,06     |
| <i>FKBP5</i>       | CT&TT           |                 | 67  | -2,14      | 0,07     | -1,36      | 0,05     | -0,28      | 0,08     | -1,89      | 0,05     | -2,43      | 0,08     |
| Sex * <i>FKBP5</i> | Men             | CC              | 31  | -2,18      | 0,10     | -1,40      | 0,08     | -0,22      | 0,09     | -1,95      | 0,08     | -2,60      | 0,12     |
| Sex * <i>FKBP5</i> | Men             | CT&TT           | 29  | -1,90      | 0,12     | -1,32      | 0,07     | -0,48      | 0,12     | -1,83      | 0,07     | -2,27      | 0,11     |
| Sex * <i>FKBP5</i> | Women           | CC              | 63  | -2,22      | 0,08     | -1,46      | 0,05     | -0,19      | 0,08     | -1,88      | 0,06     | -2,49      | 0,08     |
| Sex * <i>FKBP5</i> | Women           | CT&TT           | 38  | -2,32      | 0,07     | -1,39      | 0,08     | -0,12      | 0,11     | -1,94      | 0,07     | -2,55      | 0,11     |
